# Supplementary material for: The Impact of the Coronavirus Pandemic on the Learning Process among Students: A Comparison between Jordan and Turkey
Source: MDPI journal article supplement (doi:10.3390/educsci12050365), 2022-05-23
Supplement: s1 [file s1]

Archive with 1 entries (1 files):
- education-1690275-supplementary.pdf
