# Supplementary material for: The Impact of the Coronavirus Pandemic on the Learning Process among Students: A Comparison between Jordan and Turkey
Source: MDPI journal article supplement (doi:10.3390/educsci12050365), 2022-05-23
Supplement: s1 [file s1 › education-1690275-supplementary.pdf]

## **The impact of the coronavirus pandemic on the learning among Jordanian and Turkish students.**

### **Informed Consent Form:**

Dear participant,

This cross-sectional study involves a short survey, designed by a specialized research team from Applied Science University in Jordan and leading Universities in Turkey, to assess the effect of coronavirus pandemic on the learning process in both countries in order to provide a complete assessment of the situation in both countries.

The survey contains two sections, which will take approximately 5 minutes to answer.

### **Ethical considerations:**

No physical or emotional risks are expected, nor is there any risks resulting from participation in the survey. The data will be used by the researchers exclusively for the purposes of this research study. The data will not be made available or used by other institutions or used for other purposes. The obtained data will be processed and analyzed for the duration of the project. Upon completion of the project, the data obtained will be encrypted and securely stored as part of measures to ensure the integrity of the research.

Your participation in this research study is voluntary. You may choose not to participate. If you decide to participate in this research survey, you may withdraw at any time.

Thanks in advance for your help and cooperation. Your participation in completing this survey is greatly appreciated.

### **Electronic Consent:**

Please select your choice below:

Clicking on the "agree" button below indicating that:

1. You have read the above information.
2. You voluntarily agree to participate.

If you do not wish to participate in this research study, please decline participation by clicking on the "Disagree" button.

- ☐ Agree
- ☐ Disagree

| Section One: Demographic data                         |                                                                                                                                                                                                                                                                                                       |
|-------------------------------------------------------|-------------------------------------------------------------------------------------------------------------------------------------------------------------------------------------------------------------------------------------------------------------------------------------------------------|
| Age:                                                  | ----- (in years)                                                                                                                                                                                                                                                                                      |
| Gender:                                               | <ul style="list-style-type: none"> <li>• Male</li> <li>• Female</li> </ul>                                                                                                                                                                                                                            |
| Marital Status:                                       | <ul style="list-style-type: none"> <li>• Single</li> <li>• Married with no children</li> <li>• Married with children</li> </ul>                                                                                                                                                                       |
| Living place:                                         | <ul style="list-style-type: none"> <li>• City</li> <li>• Rural</li> <li>• Village</li> <li>• Badiah</li> </ul>                                                                                                                                                                                        |
| Nationality:                                          | <ul style="list-style-type: none"> <li>• Jordanian</li> <li>• Turkish</li> <li>• Other, please specify....</li> </ul>                                                                                                                                                                                 |
| Education level:                                      | <ul style="list-style-type: none"> <li>• Undergraduate education</li> <li>• Higher education – Master's</li> <li>• Higher education – PhD</li> </ul>                                                                                                                                                  |
| Studying field:                                       | <ul style="list-style-type: none"> <li>• Humanities related field</li> <li>• Health related field</li> <li>• Other</li> </ul>                                                                                                                                                                         |
| Type of university<br>(For Jordanian students):       | <ul style="list-style-type: none"> <li>• A public university</li> <li>• A private university</li> <li>• Other</li> </ul>                                                                                                                                                                              |
| Type of university<br>(For Turkish students):         | <ul style="list-style-type: none"> <li>• A public university</li> <li>• An endowment university</li> <li>• Other</li> </ul>                                                                                                                                                                           |
| Do you have a scholarship?<br>(For Turkish students): | <ul style="list-style-type: none"> <li>• Yes, it covers the tuition fees only</li> <li>• Yes, it covers the tuition fees and accommodation on campus fees</li> <li>• Yes, it covers the tuition fees, the accommodation on campus fees, and with a living expenses per month</li> <li>• No</li> </ul> |
| Smoking<br>(During COVID-19):                         | <ul style="list-style-type: none"> <li>• None</li> <li>• 1 packet per day</li> <li>• &gt; 1 packet per day</li> </ul>                                                                                                                                                                                 |
| Intake of Caffeine<br>(During COVID-19):              | <ul style="list-style-type: none"> <li>• None</li> <li>• &lt; 2 cups</li> <li>• 2-4 cups</li> <li>• &gt; 4 cups</li> </ul>                                                                                                                                                                            |
| Sleeping hours<br>(During COVID-19):                  | <ul style="list-style-type: none"> <li>• &lt; 4 hours</li> <li>• 4-6 hours</li> <li>• 6-8 hours</li> <li>• &gt;8 hours</li> </ul>                                                                                                                                                                     |
| Sleeping pattern<br>(During COVID-19):                | <ul style="list-style-type: none"> <li>• Mostly during daytime</li> <li>• Mostly during nighttime</li> </ul>                                                                                                                                                                                          |

**Section Two: Learning during COVID-19**

Please choose the best answer that describes your learning process during the pandemic.

How do you evaluate:

|                                                                                                                                      | Excellent | Very Good | Good | Fair | Not Good |
|--------------------------------------------------------------------------------------------------------------------------------------|-----------|-----------|------|------|----------|
| 1. Your attendance to classes/lectures during the last semester:                                                                     |           |           |      |      |          |
| 2. The theory courses that you received during the online learning last semester compared to the previous year:                      |           |           |      |      |          |
| 3. The online learning with regards to practical courses you received last semester compared to previous year:                       |           |           |      |      |          |
| 4. the received exams and assessments during the online learning last semester compared to the previous year:                        |           |           |      |      |          |
| 5. Your training during the online learning last semester compared to the previous year:                                             |           |           |      |      |          |
| 6. Your relationship with the teachers during online learning last semester compared to the previous year:                           |           |           |      |      |          |
| 7. The online learning with regards to its effect on your last semester Grade Point Average compared to last year's second semester: |           |           |      |      |          |
| 8. What was your semester Grade Point Average total mark for <u>last</u> year's first semester (2019/2020)?                          | -----     |           |      |      |          |
| 9. What was your semester Grade Point Average total mark for <u>this</u> year's first semester (2020/2021)?                          | -----     |           |      |      |          |
| 10. How many hours -in average- you used to study daily <u>before</u> COVID-19?                                                      | -----     |           |      |      |          |
| 11. How many hours -in average- you used to study daily <u>after</u> COVID-19?                                                       | -----     |           |      |      |          |
